# Supplementary material
Source: publisher site journal article supplement (https://www.dovepress.com/article/173472)
Supplement: Supplementary file 1 [file get_supplementary_file.php]

## Supplementary material

Figure S1. Literature search flow diagram of relevant studies

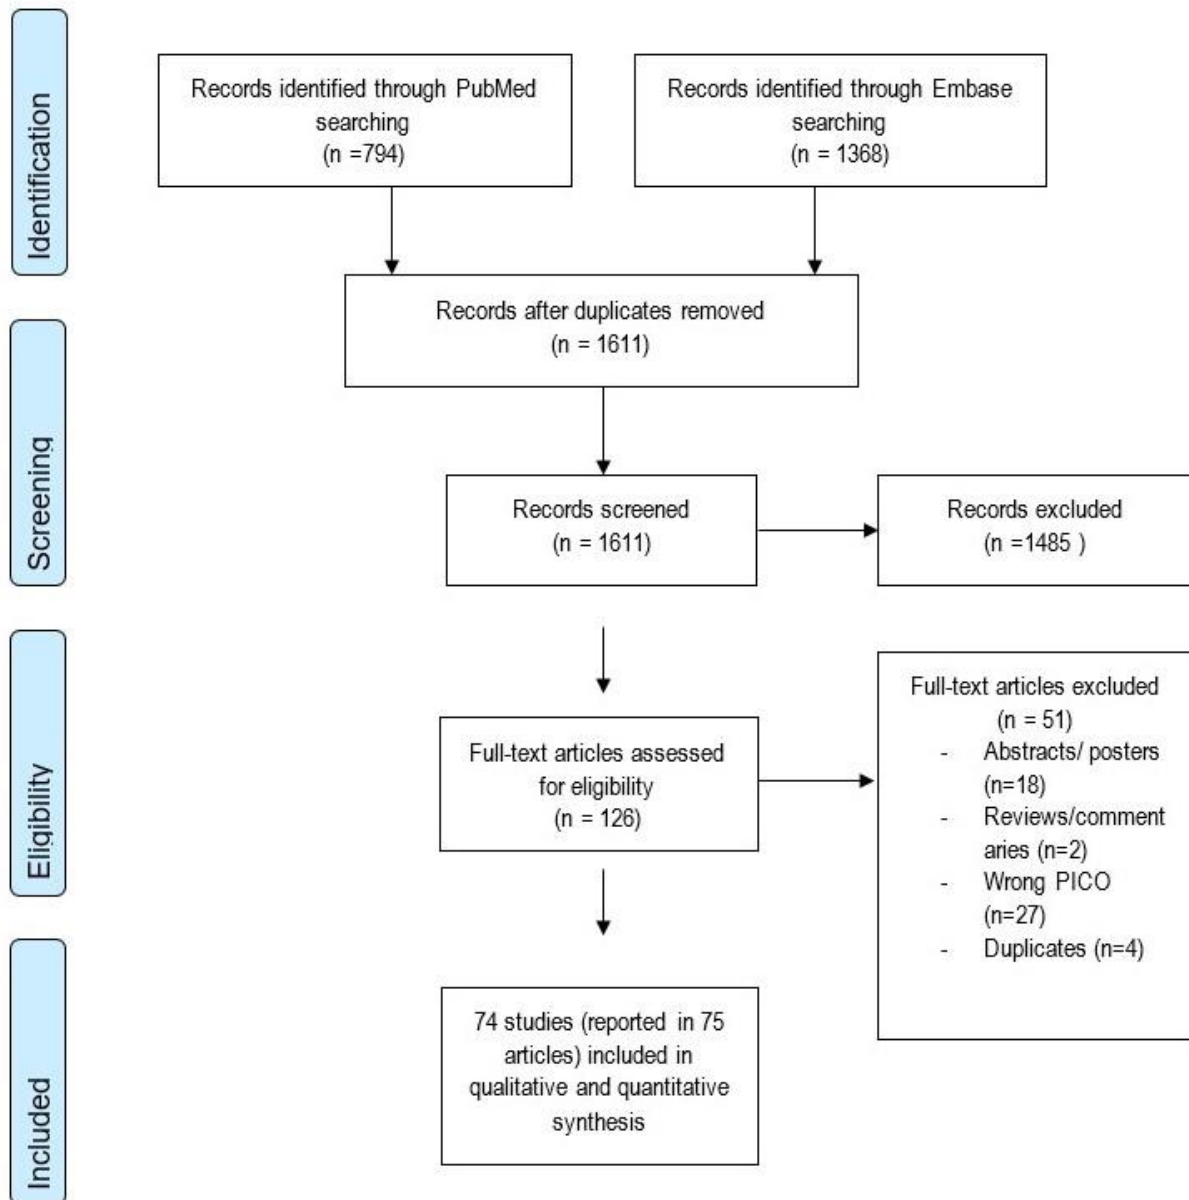

**Table S1 Pubmed and Embase search strategies**

| <b>Pubmed search strategy</b>                                                                                                                                                                                                                                                                                                                                                                                                                                                                                                                                                                                                                                                                                                                                                                                                                                                                                                                                                                                                                                                                                                                                                                                                                                                                                                                                                                                                                                                                                                                                                                                                                                                                                                                                                                                                                                                                                                                                                                                                                                                                                                                                                                                                                                                                                                                                                                                                                                                                                                                                                                                                                                                                                                                                                                                                                                                                                                                                                                                                                                                                                                   |
|---------------------------------------------------------------------------------------------------------------------------------------------------------------------------------------------------------------------------------------------------------------------------------------------------------------------------------------------------------------------------------------------------------------------------------------------------------------------------------------------------------------------------------------------------------------------------------------------------------------------------------------------------------------------------------------------------------------------------------------------------------------------------------------------------------------------------------------------------------------------------------------------------------------------------------------------------------------------------------------------------------------------------------------------------------------------------------------------------------------------------------------------------------------------------------------------------------------------------------------------------------------------------------------------------------------------------------------------------------------------------------------------------------------------------------------------------------------------------------------------------------------------------------------------------------------------------------------------------------------------------------------------------------------------------------------------------------------------------------------------------------------------------------------------------------------------------------------------------------------------------------------------------------------------------------------------------------------------------------------------------------------------------------------------------------------------------------------------------------------------------------------------------------------------------------------------------------------------------------------------------------------------------------------------------------------------------------------------------------------------------------------------------------------------------------------------------------------------------------------------------------------------------------------------------------------------------------------------------------------------------------------------------------------------------------------------------------------------------------------------------------------------------------------------------------------------------------------------------------------------------------------------------------------------------------------------------------------------------------------------------------------------------------------------------------------------------------------------------------------------------------|
| <p>((((((((((((((("Tiotropium Bromide"[Mesh] OR ("tiotropium bromide"[MeSH Terms] OR ("tiotropium"[All Fields] AND "bromide"[All Fields]) OR "tiotropium bromide"[All Fields] OR "tiotropium"[All Fields]) OR ("tiotropium bromide"[MeSH Terms] OR ("tiotropium"[All Fields] AND "bromide"[All Fields]) OR "tiotropium bromide"[All Fields] OR "spiriva"[All Fields])) OR ("GSK573719"[Supplementary Concept] OR ("GSK573719"[Supplementary Concept] OR "GSK573719"[All Fields] OR "umeclidinium"[All Fields]) OR INCRUSE[All Fields])) OR ("Glycopyrrolate"[Mesh] OR glycopyrronium[All Fields] OR SEEBRI[All Fields])) OR ("Muscarinic Antagonists"[Mesh] OR LAMA[All Fields])) OR ("aclidinium bromide"[Supplementary Concept] OR aclidinium[All Fields] OR EKLIRA[All Fields])) OR ("indacaterol"[Supplementary Concept] OR ("indacaterol"[Supplementary Concept] OR "indacaterol"[All Fields])) OR ("olodaterol"[Supplementary Concept] OR ("olodaterol"[Supplementary Concept] OR "olodaterol"[All Fields])) OR ("vilanterol"[Supplementary Concept] OR ("vilanterol"[Supplementary Concept] OR "vilanterol"[All Fields])) OR ("Formoterol Fumarate"[Mesh] OR ("formoterol fumarate"[MeSH Terms] OR ("formoterol"[All Fields] AND "fumarate"[All Fields]) OR "formoterol fumarate"[All Fields] OR "formoterol"[All Fields])) OR ("Ipratropium"[Mesh] OR ("ipratropium"[MeSH Terms] OR "ipratropium"[All Fields]) OR ("ipratropium"[MeSH Terms] OR "ipratropium"[All Fields] OR "atrovent"[All Fields])) OR ("fluticasone-salmeterol drug combination"[MeSH Terms] OR ("fluticasone-salmeterol"[All Fields] AND "drug"[All Fields] AND "combination"[All Fields]) OR "fluticasone-salmeterol drug combination"[All Fields] OR "seretide"[All Fields])) OR ("Budesonide, Formoterol Fumarate Drug Combination"[Mesh] OR ("budesonide, formoterol fumarate drug combination"[MeSH Terms] OR ("budesonide"[All Fields] AND "formoterol"[All Fields] AND "fumarate"[All Fields] AND "drug"[All Fields] AND "combination"[All Fields]) OR "formoterol fumarate drug combination budesonide"[All Fields] OR "symbicort"[All Fields])) OR ("fluticasone furoate-vilanterol trifenate"[Supplementary Concept] OR BREO[All Fields] OR RELVAR[All Fields] OR REVINTY[All Fields])) OR ("QVA149"[Supplementary Concept] OR ULTIBRO[All Fields])) OR ("tiotropium-olodaterol"[Supplementary Concept] OR SPIOLTO[All Fields])) OR ANORO[All Fields] OR DUAKLIR[All Fields] AND ("Pulmonary Disease, Chronic Obstructive"[Mesh] OR ("pulmonary disease, chronic obstructive"[MeSH Terms] OR ("pulmonary"[All Fields] AND "disease"[All Fields] AND "chronic"[All Fields] AND "obstructive"[All Fields]) OR "chronic obstructive pulmonary disease"[All Fields] OR "copd"[All Fields]) OR ("pulmonary disease, chronic obstructive"[MeSH Terms] OR ("pulmonary"[All Fields] AND "disease"[All Fields] AND "chronic"[All Fields] AND "obstructive"[All Fields]) OR "chronic obstructive pulmonary disease"[All Fields] OR ("chronic"[All Fields] AND "obstructive"[All Fields] AND "pulmonary"[All Fields] AND "disease"[All Fields]))</p> |
| <b>Embase search strategy</b>                                                                                                                                                                                                                                                                                                                                                                                                                                                                                                                                                                                                                                                                                                                                                                                                                                                                                                                                                                                                                                                                                                                                                                                                                                                                                                                                                                                                                                                                                                                                                                                                                                                                                                                                                                                                                                                                                                                                                                                                                                                                                                                                                                                                                                                                                                                                                                                                                                                                                                                                                                                                                                                                                                                                                                                                                                                                                                                                                                                                                                                                                                   |
| <p>('chronic obstructive lung disease'/exp OR 'chronic obstructive lung disease' OR 'copd'/exp OR copd OR 'chronic obstructive pulmonary disease'/exp OR 'chronic obstructive pulmonary disease') AND (('tiotropium bromide'/exp OR tiotropium OR spiriva) OR ('umeclidinium'/exp OR umeclidinium OR incuse) OR ('glycopyrronium'/exp OR glycopyrronium OR seebri) OR ('muscarinic receptor blocking agent'/exp OR lama) OR ('aclidinium bromide'/exp OR aclidinium OR eklira) OR ('indacaterol'/exp OR indacaterol) OR ('olodaterol'/exp OR olodaterol) OR ('vilanterol'/exp OR vilanterol) OR ('formoterol'/exp OR formoterol) OR ('ipratropium bromide'/exp OR ipratropium OR atrovent) OR ('fluticasone propionate plus salmeterol'/exp OR seretide) OR ('budesonide plus formoterol'/exp OR symbicort) OR ('fluticasone furoate plus vilanterol'/exp OR breo OR relvar) OR ('glycopyrronium bromide plus indacaterol'/exp OR ultibro) OR ('olodaterol plus tiotropium bromide'/exp OR spiolto) OR ('umeclidinium plus vilanterol'/exp OR anoro) OR ('aclidinium bromide plus formoterol fumarate'/exp OR duaklir)</p>                                                                                                                                                                                                                                                                                                                                                                                                                                                                                                                                                                                                                                                                                                                                                                                                                                                                                                                                                                                                                                                                                                                                                                                                                                                                                                                                                                                                                                                                                                                                                                                                                                                                                                                                                                                                                                                                                                                                                                                                      |

**Table S2** Treatment effects on TDI score at weeks 12 - NMA results: combining direct and indirect evidence (lower triangle) and direct evidence (upper triangle)

|                                                       |                               | Direct evidence               |                               |                               |                               |                            |                               |                        |                        |                        |                        |                            |                            |
|-------------------------------------------------------|-------------------------------|-------------------------------|-------------------------------|-------------------------------|-------------------------------|----------------------------|-------------------------------|------------------------|------------------------|------------------------|------------------------|----------------------------|----------------------------|
|                                                       |                               | Placebo                       | NA                            | NA                            | NA                            | -1.07<br>(-1.44,-0.69)     | -1.63<br>(-2.46,-0.79)        | -1.22<br>(-1.75,-0.69) | -0.93<br>(-1.34,-0.52) | -0.78<br>(-1.12,-0.43) | -0.99<br>(-0.16,-0.82) | -1.03<br>(-1.85,-0.21)     | -0.78<br>(-1.04,-0.52)     |
| NMA results (combining direct and indirect estimates) | -0.18<br>(-0.72,0.36)         | Ipra                          | NA                            | NA                            | NA                            | NA                         | NA                            | NA                     | NA                     | NA                     | NA                     | NA                         | -0.62<br>(-1.13,-0.11)     |
|                                                       | <b>-0.82</b><br>(-1.21,-0.43) | <b>-0.64</b><br>(-1.28,0.00)  | SFC250                        | NA                            | -0.30<br>(-0.62,0.02)         | NA                         | NA                            | NA                     | NA                     | NA                     | NA                     | NA                         | NA                         |
|                                                       | <b>-1.12</b><br>(-1.45,-0.79) | <b>-0.94</b><br>(-1.55,-0.34) | -0.31<br>(-0.74,0.12)         | SFC500                        | 0.10<br>(-0.25,0.45)          | NA                         | <b>-0.36</b><br>(-0.66,-0.05) | NA                     | NA                     | NA                     | NA                     | NA                         | NA                         |
|                                                       | <b>-1.12</b><br>(-1.34,-0.89) | <b>-0.94</b><br>(-1.49,-0.38) | -0.30<br>(-0.62,0.02)         | 0.01<br>(-0.28,0.30)          | UmecVil                       | NA                         | NA                            | 0.33<br>(-0.07,0.72)   | NA                     | NA                     | NA                     | NA                         | <b>0.40</b><br>(0.11,0.70) |
|                                                       | <b>-1.63</b><br>(-2.00,-1.25) | <b>-1.44</b><br>(-2.10,-0.78) | <b>-0.81</b><br>(-1.35,-0.27) | <b>-0.50</b><br>(-1.00,-0.00) | <b>-0.51</b><br>(-0.94,-0.07) | TioOlo                     | NA                            | NA                     | NA                     | NA                     | NA                     | <b>0.60</b><br>(0.22,0.97) | NA                         |
|                                                       | <b>-1.42</b><br>(-1.74,-1.09) | <b>-1.24</b><br>(-1.83,-0.64) | <b>-0.60</b><br>(-1.04,-0.15) | <b>-0.29</b><br>(-0.54,-0.04) | -0.30<br>(-0.61,0.01)         | 0.21<br>(-0.29,0.70)       | IndaGlyco                     | NA                     | 0.41<br>(-0.03,0.85)   | NA                     | NA                     | NA                         | <b>0.63</b><br>(0.19,1.07) |
|                                                       | <b>-0.88</b><br>(-1.13,-0.64) | <b>-0.70</b><br>(-1.26,-0.14) | -0.07<br>(-0.48,0.34)         | 0.24<br>(-0.11,0.60)          | 0.23<br>(-0.02,0.49)          | <b>0.74</b><br>(0.30,1.19) | <b>0.53</b><br>(0.18,0.88)    | Umec                   | 0.08<br>(-0.24,0.40)   | NA                     | NA                     | NA                         | 0.06<br>(-0.30,0.42)       |
|                                                       | <b>-0.84</b><br>(-1.08,-0.61) | <b>-0.66</b><br>(-1.22,-0.11) | -0.02<br>(-0.44,0.39)         | 0.28<br>(-0.06,0.63)          | <b>0.28</b><br>(0.01,0.54)    | <b>0.78</b><br>(0.34,1.22) | <b>0.57</b><br>(0.24,0.90)    | 0.04<br>(-0.19,0.27)   | Glyco                  | NA                     | NA                     | NA                         | 0.11<br>(-0.21,0.43)       |
|                                                       | <b>-0.99</b><br>(-1.16,-0.82) | <b>-0.81</b><br>(-1.38,-0.24) | -0.17<br>(-0.60,0.26)         | 0.14<br>(-0.24,0.51)          | 0.13<br>(-0.16,0.41)          | <b>0.64</b><br>(0.22,1.05) | <b>0.43</b><br>(0.06,0.79)    | -0.11<br>(-0.40,0.19)  | -0.15<br>(-0.44,0.15)  | Acl                    | NA                     | NA                         | NA                         |
|                                                       | <b>-1.03</b><br>(-1.40,-0.66) | <b>-0.85</b><br>(-1.51,-0.19) | -0.21<br>(-0.75,0.33)         | 0.09<br>(-0.40,0.59)          | 0.09<br>(-0.35,0.53)          | <b>0.60</b><br>(0.22,0.97) | 0.39<br>(-0.11,0.88)          | -0.15<br>(-0.59,0.30)  | -0.19<br>(-0.63,0.25)  | -0.04<br>(-0.45,0.37)  | Tio5                   | NA                         | NA                         |
|                                                       | <b>-0.80</b><br>(-0.98,-0.62) | <b>-0.62</b><br>(-1.13,-0.11) | 0.02<br>(-0.36,0.40)          | <b>0.32</b><br>(0.01,0.64)    | <b>0.32</b><br>(0.11,0.53)    | <b>0.82</b><br>(0.41,1.24) | <b>0.62</b><br>(0.31,0.92)    | 0.08<br>(-0.14,0.31)   | 0.04<br>(-0.17,0.25)   | 0.19<br>(-0.06,0.44)   | 0.23<br>(-0.19,0.65)   | Tio18                      |                            |

**Notes:** Comparisons between treatments should be read from left to right. The mean difference (MD) with 95% confidence interval (95%CI) are shown in the cells. MD more than 0 favors the column-defining treatment (lower triangle) and the row-defining treatment (upper triangle). Statistically significant results in bold. Higher scores indicate better symptom control.

**Abbreviations:** Acl, acclidinium; Glyco, glycopyrronium; IndaGlyco, indacaterol/glycopyrronium; Ipra, ipratropium; NA, results not available; SFC250, fluticasone/salmeterol 250/50mcg; SFC500, fluticasone/salmeterol 500/50mcg; Tio5, tiotropium 5mcg; Tio18, tiotropium 18mcg; TioOlo, tiotropium/olodaterol; Umec, umecclidinium; UmecVil, umecclidinium/vilanterol.

**Table S3** Treatment effects on TDI score at week 24 - NMA results: combining direct and indirect evidence (lower triangle) and direct evidence (upper triangle)

| NMA results (combining direct and indirect estimates) | Direct evidence               |                               |                       |                               |                               |                               |                              |                               |                               |                               |
|-------------------------------------------------------|-------------------------------|-------------------------------|-----------------------|-------------------------------|-------------------------------|-------------------------------|------------------------------|-------------------------------|-------------------------------|-------------------------------|
|                                                       | Placebo                       | NA                            | NA                    | <b>-0.96</b><br>(-1.45,-0.48) | <b>-1.09</b><br>(-1.57,-0.61) | <b>-1.37</b><br>(-1.75,-1.00) | <b>1.00</b><br>(-1.50,-0.50) | <b>-0.93</b><br>(-1.19,-0.66) | <b>-0.96</b><br>(-1.28,-0.64) | <b>-0.83</b><br>(-1.04,-0.63) |
|                                                       | 0.33<br>(-0.26,0.93)          | Ipra                          | NA                    | NA                            | NA                            | NA                            | NA                           | NA                            | NA                            | <b>-1.20</b><br>(-1.77,-0.64) |
|                                                       | <b>-1.09</b><br>(-1.46,-0.72) | <b>-1.43</b><br>(-2.11,-0.74) | SFC500                | NA                            | -0.42<br>(-1.03,0.20)         | 0.00<br>(-0.45,0.45)          | NA                           | NA                            | NA                            | NA                            |
|                                                       | <b>-0.94</b><br>(-1.24,-0.65) | <b>-1.28</b><br>(-1.92,-0.64) | 0.15<br>(-0.32,0.62)  | UmecVil                       | NA                            | NA                            | 0.30<br>(-0.15,0.75)         | NA                            | NA                            | 0.03<br>(-0.43,0.48)          |
|                                                       | <b>-1.35</b><br>(-1.69,-1.01) | <b>-1.68</b><br>(-2.35,-1.02) | -0.26<br>(-0.52,0.00) | -0.41<br>(-0.85,0.04)         | IndaGlyco                     | NA                            | NA                           | 0.21<br>(-0.26,0.68)          | NA                            | <b>0.51</b><br>(0.04,0.98)    |
|                                                       | <b>-1.27</b><br>(-1.58,-0.96) | <b>-1.60</b><br>(-2.27,-0.94) | -0.18<br>(-0.54,0.18) | -0.33<br>(-0.75,0.10)         | 0.08<br>(-0.30,0.46)          | AcIForm                       | NA                           | NA                            | <b>0.43</b><br>(0.09,0.76)    | NA                            |
|                                                       | <b>-0.85</b><br>(-1.29,-0.41) | <b>-1.18</b><br>(-1.91,-0.45) | 0.24<br>(-0.33,0.82)  | 0.10<br>(-0.32,0.52)          | 0.50<br>(-0.05,1.05)          | 0.42<br>(-0.11,0.96)          | Umec                         | NA                            | NA                            | NA                            |
|                                                       | <b>-0.96</b><br>(-1.21,-0.72) | <b>-1.30</b><br>(-1.92,-0.68) | 0.13<br>(-0.28,0.54)  | -0.02<br>(-0.39,0.35)         | <b>0.38</b><br>(0.01,0.76)    | 0.31<br>(-0.08,0.69)          | -0.12<br>(-0.61,0.38)        | Glyco                         | NA                            | 0.10<br>(-0.33,0.53)          |
|                                                       | <b>-0.91</b><br>(-1.22,-0.61) | <b>-1.25</b><br>(-1.91,-0.58) | 0.18<br>(-0.25,0.61)  | 0.03<br>(-0.39,0.45)          | <b>0.44</b><br>(0.02,0.85)    | <b>0.36</b><br>(0.04,0.67)    | -0.07<br>(-0.60,0.47)        | 0.05<br>(-0.33,0.44)          | AcI                           | NA                            |
| <b>-0.87</b><br>(-1.06,-0.68)                         | <b>-1.20</b><br>(-1.77,-0.64) | 0.22<br>(-0.17,0.62)          | 0.07<br>(-0.23,0.38)  | <b>0.48</b><br>(0.12,0.84)    | <b>0.40</b><br>(0.05,0.75)    | -0.02<br>(-0.48,0.44)         | 0.09<br>(-0.17,0.36)         | 0.04<br>(-0.31,0.40)          | Tio18                         |                               |

**Notes:** Comparisons between treatments should be read from left to right. The mean difference (MD) with 95% confidence interval (95%CI) are shown in the cells. MD more than 0 favors the column-defining treatment (lower triangle) and the row-defining treatment (upper triangle). Statistically significant results in bold. Higher scores indicate better symptom control.

**Abbreviations:** AcI, acclidinium; AcIForm, acclidinium/formoterol; Glyco, glycopyrronium; IndaGlyco, indacaterol/glycopyrronium; Ipra, ipratropium; NA, results not available; SFC500, fluticasone/salmeterol 500/50mcg; Tio18, tiotropium 18mcg; Umec, umeclidinium; UmecVil, umeclidinium/vilanterol.

**Table S4** Treatment effects on proportion of TDI responders at week 12 - NMA results: combining direct and indirect evidence (lower triangle) and direct evidence (upper triangle)

| NMA results (combining direct and indirect estimates) | Direct evidence            |                            |                            |                     |                     |                            |                            |                            |                            |                            |
|-------------------------------------------------------|----------------------------|----------------------------|----------------------------|---------------------|---------------------|----------------------------|----------------------------|----------------------------|----------------------------|----------------------------|
|                                                       | Placebo                    | NA                         | NA                         | NA                  | NA                  | <b>0.36</b><br>(0.26,0.49) | <b>0.25</b><br>(0.10,0.61) | <b>0.33</b><br>(0.21,0.52) | <b>0.50</b><br>(0.41,0.61) | <b>0.60</b><br>(0.44,0.81) |
|                                                       | 0.73<br>(0.42,1.27)        | Ipra                       | NA                         | NA                  | NA                  | NA                         | NA                         | NA                         | NA                         | <b>0.66</b><br>(0.46,0.96) |
|                                                       | <b>0.31</b><br>(0.18,0.55) | <b>0.43</b><br>(0.23,0.81) | SFC500                     | 1.03<br>(0.76,1.40) | 1.44<br>(0.97,2.13) | NA                         | NA                         | NA                         | NA                         | NA                         |
|                                                       | <b>0.32</b><br>(0.21,0.49) | <b>0.44</b><br>(0.27,0.74) | 1.03<br>(0.70,1.52)        | UmeclVil            | NA                  | NA                         | NA                         | NA                         | NA                         | <b>1.50</b><br>(1.21,1.86) |
|                                                       | <b>0.45</b><br>(0.22,0.93) | 0.62<br>(0.28,1.35)        | 1.44<br>(0.91,2.28)        | 1.39<br>(0.77,2.53) | IndaGlyco           | NA                         | NA                         | NA                         | NA                         | NA                         |
|                                                       | <b>0.37</b><br>(0.26,0.53) | <b>0.50</b><br>(0.26,0.97) | 1.17<br>(0.60,2.30)        | 1.14<br>(0.66,1.97) | 0.82<br>(0.36,1.84) | AcIForm                    | NA                         | NA                         | 1.33<br>(0.98,1.81)        | NA                         |
|                                                       | <b>0.42</b><br>(0.28,0.61) | <b>0.57</b><br>(0.33,0.98) | 1.33<br>(0.76,2.33)        | 1.28<br>(0.85,1.93) | 0.92<br>(0.45,1.90) | 1.13<br>(0.67,1.92)        | Umec                       | 1.11<br>(0.87,1.41)        | NA                         | 0.98<br>(0.77,1.25)        |
|                                                       | <b>0.42</b><br>(0.28,0.62) | 0.57<br>(0.31,1.03)        | 1.33<br>(0.72,2.45)        | 1.28<br>(0.80,2.07) | 0.92<br>(0.43,1.98) | 1.13<br>(0.66,1.95)        | 1.00<br>(0.74,1.36)        | Glyco                      | NA                         | NA                         |
|                                                       | <b>0.51</b><br>(0.40,0.64) | 0.69<br>(0.38,1.26)        | 1.62<br>(0.87,2.99)        | 1.56<br>(0.97,2.52) | 1.12<br>(0.52,2.41) | 1.38<br>(0.96,1.96)        | 1.22<br>(0.77,1.92)        | 1.22<br>(0.76,1.95)        | AcI                        | NA                         |
| <b>0.48</b><br>(0.35,0.67)                            | 0.66<br>(0.42,1.03)        | 1.55<br>(0.97,2.45)        | <b>1.49</b><br>(1.16,1.93) | 1.07<br>(0.56,2.06) | 1.32<br>(0.81,2.14) | 1.16<br>(0.85,1.60)        | 1.16<br>(0.78,1.73)        | 0.96<br>(0.64,1.43)        | Tio18                      |                            |

**Notes:** Comparisons between treatments should be read from left to right. The odds ratio (OR) with 95%CI are shown in the cells. OR more than 1 favors the column-defining

treatment (lower triangle) and the row-defining treatment (upper triangle). Statistically significant results in **bold**.

**Abbreviations:** AcI, acclidinium; AcIForm, acclidinium/formoterol; Glyco, glycopyrronium; IndaGlyco, indacaterol/glycopyrronium; Ipra, ipratropium; NA, results not available; SFC500, fluticasone/salmeterol 500/50mcg; Tio18, tiotropium 18mcg; Umec, umeclidinium; UmeclVil, umeclidinium/vilanterol.

**Table S5** Treatment effects on proportion of TDI responders at week 24 - NMA results: combining direct and indirect evidence (lower triangle) and direct evidence (upper triangle)

| NMA results (combining direct and indirect estimates) | Direct evidence            |                            |                     |                            |                            |                            |                            |                            |                            |                            |
|-------------------------------------------------------|----------------------------|----------------------------|---------------------|----------------------------|----------------------------|----------------------------|----------------------------|----------------------------|----------------------------|----------------------------|
|                                                       | Placebo                    | NA                         | NA                  | <b>0.61</b><br>(0.40,0.92) | <b>0.63</b><br>(0.45,0.87) | <b>0.43</b><br>(0.34,0.55) | <b>0.62</b><br>(0.46,0.85) | <b>0.61</b><br>(0.50,0.76) | <b>0.57</b><br>(0.47,0.69) | <b>0.69</b><br>(0.55,0.85) |
|                                                       | 1.54<br>(0.94,2.53)        | Ipra                       | NA                  | NA                         | NA                         | NA                         | NA                         | NA                         | NA                         | <b>0.42</b><br>(0.27,0.65) |
|                                                       | <b>0.56</b><br>(0.41,0.78) | <b>0.37</b><br>(0.20,0.65) | SFC500              | NA                         | <b>0.64</b><br>(0.43,0.94) | 0.95<br>(0.74,1.24)        | NA                         | NA                         | NA                         | NA                         |
|                                                       | <b>0.60</b><br>(0.48,0.75) | <b>0.39</b><br>(0.23,0.65) | 1.07<br>(0.73,1.55) | UmecVil                    | NA                         | NA                         | 1.23<br>(0.94,1.62)        | NA                         | NA                         | 1.08<br>(0.80,1.45)        |
|                                                       | <b>0.45</b><br>(0.35,0.58) | <b>0.29</b><br>(0.17,0.50) | 0.80<br>(0.57,1.11) | 0.75<br>(0.54,1.03)        | IndaGlyco                  | NA                         | NA                         | 1.22<br>(0.93,1.60)        | NA                         | <b>1.48</b><br>(1.13,1.93) |
|                                                       | <b>0.48</b><br>(0.38,0.60) | <b>0.31</b><br>(0.18,0.53) | 0.85<br>(0.64,1.12) | 0.79<br>(0.58,1.09)        | 1.06<br>(0.78,1.45)        | AcIForm                    | NA                         | NA                         | <b>1.27</b><br>(1.03,1.57) | NA                         |
|                                                       | <b>0.69</b><br>(0.50,0.94) | <b>0.45</b><br>(0.25,0.79) | 1.22<br>(0.78,1.91) | 1.15<br>(0.85,1.55)        | <b>1.53</b><br>(1.03,2.28) | 1.44<br>(0.98,2.13)        | Umec                       | NA                         | NA                         | NA                         |
|                                                       | <b>0.58</b><br>(0.48,0.69) | <b>0.37</b><br>(0.22,0.62) | 1.02<br>(0.72,1.45) | 0.96<br>(0.74,1.25)        | 1.28<br>(0.98,1.68)        | 1.21<br>(0.91,1.60)        | 0.84<br>(0.59,1.19)        | Glyco                      | NA                         | 1.15<br>(0.95,1.41)        |
|                                                       | <b>0.59</b><br>(0.48,0.73) | <b>0.38</b><br>(0.22,0.66) | 1.05<br>(0.75,1.47) | 0.98<br>(0.73,1.33)        | 1.31<br>(0.96,1.81)        | 1.24<br>(0.99,1.56)        | 0.86<br>(0.59,1.25)        | 1.02<br>(0.78,1.35)        | AcI                        | NA                         |
| <b>0.65</b><br>(0.56,0.76)                            | <b>0.42</b><br>(0.26,0.68) | 1.16<br>(0.82,1.63)        | 1.09<br>(0.87,1.35) | <b>1.45</b><br>(1.11,1.89) | <b>1.37</b><br>(1.04,1.80) | 0.95<br>(0.68,1.32)        | 1.13<br>(0.93,1.37)        | 1.10<br>(0.85,1.43)        | Tio18                      |                            |

**Notes:** Comparisons between treatments should be read from left to right. The odds ratio (OR) with 95%CI are shown in the cells. OR more than 1 favors the column-defining

treatment (lower triangle) and the row-defining treatment (upper triangle). Statistically significant results in **bold**.

**Abbreviations:** AcI, acclidinium; AcIForm, acclidinium/formoterol; Glyco, glycopyrronium; IndaGlyco, indacaterol/glycopyrronium; Ipra, ipratropium; NA, results not available; SFC500, fluticasone/salmeterol 500/50mcg; Tio18, tiotropium 18mcg; Umec, umeclidinium; UmecVil, umeclidinium/vilanterol.

**Table S6** Treatment effects on SGRQ score at week 12 - NMA results: combining direct and indirect evidence (lower triangle) and direct evidence (upper triangle)

|                                                       |                            | Direct evidence            |                               |                            |                               |                               |                               |                               |                       |                               |                            |                               |                               |
|-------------------------------------------------------|----------------------------|----------------------------|-------------------------------|----------------------------|-------------------------------|-------------------------------|-------------------------------|-------------------------------|-----------------------|-------------------------------|----------------------------|-------------------------------|-------------------------------|
|                                                       |                            | Placebo                    | 1.29<br>(-1.19,3.78)          | <b>3.68</b><br>(1.03,6.33) | NA                            | NA                            | <b>4.03</b><br>(1.79,6.38)    | <b>4.72</b><br>(3.33,6.11)    | NA                    | <b>7.9</b><br>(3.6,12.2)      | <b>4.24</b><br>(2.42,6.05) | <b>2.50</b><br>(1.60,3.40)    | <b>2.63</b><br>(1.24,4.03)    |
| NMA results (combining direct and indirect estimates) | 1.37<br>(-0.52,3.25)       | <b>lpra</b>                | NA                            | NA                         | NA                            | NA                            | NA                            | NA                            | NA                    | NA                            | NA                         | NA                            | 1.67<br>(-0.24,3.59)          |
|                                                       | <b>4.59</b><br>(3.04,6.14) | <b>3.22</b><br>(0.96,5.49) | <b>FFVI</b>                   | NA                         | -1.30<br>(-3.45,0.85)         | NA                            | NA                            | NA                            | NA                    | NA                            | NA                         | NA                            | -1.25<br>(-2.77,0.28)         |
|                                                       | <b>3.77</b><br>(1.66,5.88) | 2.40<br>(-0.26,5.06)       | -0.82<br>(-3.16,1.52)         | <b>SFC250</b>              | NA                            | 0.48<br>(-1.50,2.45)          | NA                            | NA                            | NA                    | NA                            | NA                         | NA                            | NA                            |
|                                                       | <b>4.48</b><br>(2.88,6.07) | <b>3.11</b><br>(0.82,5.39) | -0.11<br>(-1.78,1.55)         | 0.71<br>(-1.52,2.94)       | <b>SFC500</b>                 | -0.53<br>(-2.26,1.20)         | NA                            | 0.64<br>(-0.51,1.78)          | NA                    | NA                            | NA                         | NA                            | 3.00<br>(-4.61,10.61)         |
|                                                       | <b>4.22</b><br>(2.93,5.51) | <b>2.85</b><br>(0.78,4.93) | -0.37<br>(-2.01,1.27)         | 0.45<br>(-1.22,2.12)       | -0.26<br>(-1.74,1.23)         | <b>UmecVil</b>                | NA                            | NA                            | NA                    | NA                            | NA                         | NA                            | <b>-1.30</b><br>(-2.35,-0.25) |
|                                                       | <b>4.72</b><br>(3.04,6.40) | <b>3.35</b><br>(0.83,5.88) | 0.13<br>(-2.16,2.42)          | 0.95<br>(-1.75,3.65)       | 0.25<br>(-2.07,2.57)          | 0.50<br>(-1.62,2.62)          | <b>TioOlo</b>                 | NA                            | NA                    | NA                            | NA                         | <b>-2.09</b><br>(-3.46,-0.72) | NA                            |
|                                                       | <b>5.37</b><br>(3.76,6.99) | <b>4.00</b><br>(1.71,6.30) | 0.78<br>(-0.97,2.53)          | 1.60<br>(-0.68,3.88)       | 0.90<br>(-0.09,1.88)          | 1.15<br>(-0.40,2.71)          | 0.65<br>(-1.68,2.98)          | <b>IndaGlyco</b>              | NA                    | <b>-2.40</b><br>(-4.01,-0.79) | NA                         | NA                            | <b>-2.88</b><br>(-4.54,-1.22) |
|                                                       | <b>4.32</b><br>(2.73,5.91) | <b>2.96</b><br>(0.65,5.26) | -0.27<br>(-2.25,1.71)         | 0.55<br>(-1.87,2.98)       | -0.15<br>(-2.13,1.82)         | 0.10<br>(-1.65,1.86)          | -0.40<br>(-2.71,1.92)         | -1.05<br>(-3.03,0.93)         | <b>Umec</b>           | -0.64<br>(-2.17,0.89)         | NA                         | NA                            | -0.46<br>(-2.05,1.13)         |
|                                                       | <b>3.70</b><br>(2.65,4.75) | <b>2.33</b><br>(0.32,4.35) | -0.89<br>(-2.50,0.73)         | -0.07<br>(-2.21,2.07)      | -0.77<br>(-2.33,0.78)         | -0.52<br>(-1.86,0.83)         | -1.02<br>(-3.00,0.96)         | <b>-1.67</b><br>(-3.20,-0.14) | -0.62<br>(-2.11,0.86) | <b>Glyco</b>                  | NA                         | NA                            | -0.10<br>(-1.10,0.90)         |
|                                                       | <b>2.54</b><br>(1.51,3.56) | 1.17<br>(-0.98,3.32)       | <b>-2.05</b><br>(-3.92,-0.19) | -1.23<br>(-3.59,1.12)      | <b>-1.94</b><br>(-3.85,-0.03) | <b>-1.68</b><br>(-3.34,-0.03) | <b>-2.19</b><br>(-4.15,-0.22) | <b>-2.84</b><br>(-4.76,-0.91) | -1.79<br>(-3.68,0.10) | -1.17<br>(-2.65,0.32)         | <b>Acl</b>                 | NA                            | NA                            |
|                                                       | <b>2.63</b><br>(0.95,4.32) | 1.27<br>(-1.27,3.80)       | -1.96<br>(-4.25,0.33)         | -1.14<br>(-3.84,1.56)      | -1.84<br>(-4.17,0.48)         | -1.59<br>(-3.71,0.54)         | <b>-2.09</b><br>(-3.75,-0.42) | <b>-2.74</b><br>(-5.07,-0.40) | -1.69<br>(-4.01,0.63) | -1.07<br>(-3.06,0.92)         | 0.10<br>(-1.88,2.07)       | <b>Tio5</b>                   | NA                            |
|                                                       | <b>3.09</b><br>(2.11,4.06) | 1.72<br>(-0.12,3.56)       | <b>-1.50</b><br>(-2.89,-0.11) | -0.68<br>(-2.64,1.28)      | -1.39<br>(-2.80,0.03)         | <b>-1.13</b><br>(-2.16,-0.11) | -1.63<br>(-3.58,0.31)         | <b>-2.28</b><br>(-3.72,-0.85) | -1.24<br>(-2.71,0.24) | -0.61<br>(-1.61,0.39)         | 0.55<br>(-0.87,1.97)       | 0.46<br>(-1.49,2.40)          | <b>Tio18</b>                  |

**Notes:** Comparisons between treatments should be read from left to right. The mean difference (MD) with 95% confidence interval (95%CI) are shown in the cells. MD less than 0

favors the column-defining treatment (lower triangle) and the row-defining treatment (upper triangle). Statistically significant results in **bold**. Lower scores indicate better quality of life.

**Abbreviations:** Acl, acclidinium; FFVI, fluticasone/vilanterol; Glyco, glycopyrronium; IndaGlyco, indacaterol/glycopyrronium; lpra, ipratropium; NA, results not available; SFC250, fluticasone/salmeterol 250/50mcg; SFC500, fluticasone/salmeterol 500/50mcg; Tio5, tiotropium 5mcg; Tio18, tiotropium 18mcg; TioOlo, tiotropium/olodaterol; Umec, umeclidinium; UmecVil, umeclidinium/vilanterol.

**Table S7** Treatment effects on SGRQ score at week 24 - NMA results: combining direct and indirect evidence (lower triangle) and direct evidence (upper triangle)

|                                                       | Direct evidence            |                      |                            |                            |                            |                            |                       |                            |                       |                            |                            |                               |                           |                               |                               |
|-------------------------------------------------------|----------------------------|----------------------|----------------------------|----------------------------|----------------------------|----------------------------|-----------------------|----------------------------|-----------------------|----------------------------|----------------------------|-------------------------------|---------------------------|-------------------------------|-------------------------------|
|                                                       | Placebo                    | NA                   | <b>4.08</b><br>(0.63,7.53) | <b>3.12</b><br>(1.04,5.20) | -1.86<br>(-9.21,5.48)      | <b>3.86</b><br>(0.45,7.28) | NA                    | <b>3.01</b><br>(0.97,5.05) | 2.56<br>(-1.07,6.20)  | <b>4.69</b><br>(2.31,7.07) | <b>3.41</b><br>(1.91,4.91) | 2.50<br>(-0.45,5.45)          | <b>2.2</b><br>(1.30,3.10) | <b>2.38</b><br>(1.73,3.03)    |                               |
| NMA results (combining direct and indirect estimates) | 0.10<br>(-3.69,3.88)       | Ipra                 | NA                         | NA                         | NA                         | NA                         | NA                    | NA                         | NA                    | NA                         | NA                         | NA                            | NA                        | 2.10<br>(-0.21,4.41)          |                               |
|                                                       | 4.08<br>(-0.35,8.51)       | 3.98<br>(-1.84,9.81) | FFVI                       | NA                         | NA                         | NA                         | NA                    | NA                         | NA                    | NA                         | NA                         | NA                            | NA                        | NA                            |                               |
|                                                       | 3.12<br>(-0.35,6.59)       | 3.02<br>(-2.11,8.16) | -0.96<br>(-6.59,4.67)      | BudeForm                   | NA                         | NA                         | NA                    | NA                         | NA                    | NA                         | NA                         | NA                            | NA                        | NA                            | NA                            |
|                                                       | 0.86<br>(-1.04,2.75)       | 0.76<br>(-3.39,4.90) | -3.22<br>(-8.04,1.59)      | -2.26<br>(-6.22,1.69)      | SFC500                     | NA                         | NA                    | <b>1.13</b><br>(0.48,1.78) | NA                    | NA                         | NA                         | NA                            | NA                        | NA                            | NA                            |
|                                                       | <b>3.32</b><br>(1.52,5.12) | 3.22<br>(-0.78,7.21) | -0.76<br>(-5.54,4.02)      | 0.20<br>(-3.71,4.11)       | 2.46<br>(-0.04,4.97)       | UmeclVil                   | NA                    | NA                         | NA                    | NA                         | -0.82<br>(-2.91,1.27)      | NA                            | NA                        | NA                            | -0.85<br>(-2.65,0.95)         |
|                                                       | 3.43<br>(-0.74,7.60)       | 3.33<br>(-2.30,8.97) | -0.65<br>(-6.73,5.44)      | 0.31<br>(-5.11,5.74)       | 2.58<br>(-2.00,7.16)       | 0.12<br>(-4.43,4.66)       | TioOlo                | NA                         | NA                    | NA                         | NA                         | NA                            | NA                        | <b>-1.23</b><br>(-2.31,-0.15) | NA                            |
|                                                       | <b>2.92</b><br>(1.14,4.70) | 2.82<br>(-1.23,6.87) | -1.16<br>(-5.93,3.61)      | -0.20<br>(-4.10,3.70)      | <b>2.06</b><br>(0.46,3.67) | -0.40<br>(-2.78,1.98)      | -0.51<br>(-5.05,4.02) | IndaGlyco                  | NA                    | NA                         | NA                         | <b>-1.50</b><br>(-2.77,-0.23) | NA                        | NA                            | <b>-1.94</b><br>(-0.68,-3.19) |
|                                                       | <b>3.04</b><br>(0.65,5.44) | 2.95<br>(-1.53,7.42) | -1.04<br>(-6.07,4.00)      | -0.08<br>(-4.29,4.14)      | 2.19<br>(-0.85,5.23)       | -0.27<br>(-3.27,2.72)      | -0.39<br>(-5.20,4.42) | 0.12<br>(-2.85,3.10)       | AcIForm               | NA                         | NA                         | NA                            | -0.78<br>(-2.19,0.63)     | NA                            | NA                            |
|                                                       | <b>3.49</b><br>(0.27,6.70) | 3.39<br>(-1.49,8.26) | -0.59<br>(-6.07,4.88)      | 0.37<br>(-4.36,5.09)       | 2.63<br>(-1.06,6.32)       | 0.17<br>(-3.00,3.33)       | 0.05<br>(-5.21,5.32)  | 0.57<br>(-3.05,4.19)       | 0.44<br>(-3.57,4.45)  | Umecl                      | NA                         | NA                            | NA                        | NA                            | NA                            |
|                                                       | <b>2.93</b><br>(1.52,4.35) | 2.84<br>(-1.08,6.76) | -1.15<br>(-5.80,3.50)      | -0.19<br>(-3.93,3.56)      | 2.08<br>(-0.05,4.21)       | -0.38<br>(-2.53,1.76)      | -0.50<br>(-4.90,3.91) | 0.02<br>(-1.89,1.92)       | -0.11<br>(-2.89,2.67) | -0.55<br>(-4.01,2.91)      | Glyco                      | NA                            | NA                        | NA                            | -0.56<br>(-1.60,0.49)         |
|                                                       | <b>2.58</b><br>(0.53,4.63) | 2.48<br>(-1.82,6.79) | -1.50<br>(-6.38,3.38)      | -0.54<br>(-4.57,3.49)      | 1.72<br>(-1.05,4.50)       | -0.74<br>(-3.46,1.99)      | -0.85<br>(-5.50,3.80) | -0.34<br>(-3.05,2.37)      | -0.46<br>(-2.79,1.86) | -0.91<br>(-4.72,2.91)      | -0.35<br>(-2.84,2.13)      | AcI                           | NA                        | NA                            | NA                            |
|                                                       | 2.20<br>(-0.72,5.12)       | 2.10<br>(-2.68,6.88) | -1.88<br>(-7.19,3.42)      | -0.92<br>(-5.46,3.61)      | 1.34<br>(-2.13,4.82)       | -1.12<br>(-4.55,2.31)      | -1.23<br>(-4.21,1.75) | -0.72<br>(-4.14,2.70)      | -0.84<br>(-4.62,2.93) | -1.29<br>(-5.63,3.06)      | -0.73<br>(-3.98,2.51)      | -0.38<br>(-3.95,3.19)         | Tio5                      | NA                            | NA                            |
|                                                       | <b>2.20</b><br>(1.07,3.32) | 2.10<br>(-1.51,5.71) | -1.88<br>(-6.45,2.69)      | -0.92<br>(-4.57,2.73)      | 1.34<br>(-0.69,3.37)       | -1.12<br>(-2.83,0.58)      | -1.24<br>(-5.56,3.09) | -0.72<br>(-2.56,1.11)      | -0.85<br>(-3.49,1.80) | -1.29<br>(-4.56,1.99)      | -0.74<br>(-2.26,0.79)      | -0.38<br>(-2.72,1.96)         | -0.00<br>(-3.13,3.13)     | Tio18                         | NA                            |

**Notes:** Comparisons between treatments should be read from left to right. The mean difference (MD) with 95% confidence interval (95%CI) are shown in the cells. MD less than 0 favors the column-defining treatment (lower triangle) and the row-defining treatment (upper triangle). Statistically significant results in **bold**. Lower scores indicate better quality of life.

**Abbreviations:** AcI, acridinium; AcIForm, acridinium/formoterol; BudeForm, budesonide/formoterol; FFVI, fluticasone/vilanterol; Glyco, glycopyrronium; IndaGlyco, indacaterol/glycopyrronium; Ipra, ipratropium; NA, results not available; SFC500, fluticasone/salmeterol 500/50mcg; Tio5, tiotropium 5mcg; Tio18, tiotropium 18mcg; TioOlo, tiotropium/olodaterol; Umecl, umeclidinium; UmeclVil, umeclidinium/vilanterol.



**Table S8** Treatment effects on proportion of SGRQ responders at week 12 - NMA results: combining direct and indirect evidence (lower triangle) and direct evidence (upper triangle)

|                                                       |                            | Direct evidence            |                     |                     |                     |                            |                            |                            |                            |                            |                            |                            |
|-------------------------------------------------------|----------------------------|----------------------------|---------------------|---------------------|---------------------|----------------------------|----------------------------|----------------------------|----------------------------|----------------------------|----------------------------|----------------------------|
|                                                       |                            | Placebo                    | NA                  | NA                  | NA                  | <b>0.62</b><br>(0.43,0.89) | NA                         | NA                         | <b>0.53</b><br>(0.39,0.72) | NA                         | <b>0.51</b><br>(0.34,0.76) | <b>0.73</b><br>(0.60,0.88) |
| NMA results (combining direct and indirect estimates) | 0.74<br>(0.46,1.19)        | Ipra                       | NA                  | NA                  | NA                  | NA                         | NA                         | NA                         | NA                         | NA                         | NA                         | 0.83<br>(0.57,1.19)        |
|                                                       | <b>0.48</b><br>(0.30,0.76) | 0.65<br>(0.39,1.09)        | FFVI                | NA                  | NA                  | NA                         | NA                         | NA                         | NA                         | NA                         | NA                         | 1.27<br>(0.90,1.81)        |
|                                                       | <b>0.51</b><br>(0.35,0.73) | 0.68<br>(0.43,1.09)        | 1.06<br>(0.67,1.66) | SFC500              | 0.96<br>(0.71,1.30) | NA                         | 0.99<br>(0.69,1.43)        | NA                         | NA                         | NA                         | NA                         | NA                         |
|                                                       | <b>0.52</b><br>(0.39,0.69) | 0.70<br>(0.47,1.06)        | 1.09<br>(0.73,1.62) | 1.03<br>(0.79,1.34) | UmeclVil            | NA                         | NA                         | NA                         | NA                         | NA                         | NA                         | 1.16<br>(0.90,1.51)        |
|                                                       | <b>0.39</b><br>(0.26,0.59) | <b>0.53</b><br>(0.33,0.85) | 0.82<br>(0.51,1.30) | 0.77<br>(0.52,1.16) | 0.75<br>(0.54,1.05) | TioOlo                     | NA                         | NA                         | NA                         | NA                         | NA                         | <b>1.56</b><br>(1.17,2.07) |
|                                                       | <b>0.45</b><br>(0.33,0.63) | <b>0.61</b><br>(0.40,0.94) | 0.95<br>(0.63,1.43) | 0.90<br>(0.68,1.19) | 0.87<br>(0.69,1.10) | 1.16<br>(0.82,1.65)        | IndaGlyco                  | NA                         | NA                         | <b>1.29</b><br>(1.05,1.59) | NA                         | <b>1.37</b><br>(1.12,1.69) |
|                                                       | <b>0.50</b><br>(0.37,0.67) | 0.67<br>(0.38,1.17)        | 1.03<br>(0.60,1.79) | 0.98<br>(0.61,1.57) | 0.95<br>(0.63,1.43) | 1.27<br>(0.76,2.10)        | 1.09<br>(0.70,1.69)        | AcIForm                    | NA                         | NA                         | <b>1.56</b><br>(1.15,2.12) | NA                         |
|                                                       | <b>0.60</b><br>(0.43,0.84) | 0.81<br>(0.53,1.24)        | 1.25<br>(0.83,1.89) | 1.18<br>(0.85,1.65) | 1.15<br>(0.89,1.49) | <b>1.53</b><br>(1.07,2.18) | <b>1.32</b><br>(1.01,1.72) | 1.21<br>(0.77,1.89)        | Umecl                      | 0.94<br>(0.73,1.20)        | NA                         | 1.03<br>(0.80,1.32)        |
|                                                       | <b>0.57</b><br>(0.42,0.76) | 0.77<br>(0.51,1.15)        | 1.18<br>(0.80,1.75) | 1.12<br>(0.83,1.51) | 1.09<br>(0.88,1.35) | <b>1.45</b><br>(1.04,2.01) | <b>1.25</b><br>(1.01,1.53) | 1.14<br>(0.75,1.73)        | 0.95<br>(0.77,1.16)        | Glyco                      | NA                         | 1.06<br>(0.89,1.26)        |
|                                                       | <b>0.72</b><br>(0.59,0.89) | 0.98<br>(0.59,1.64)        | 1.51<br>(0.92,2.50) | 1.43<br>(0.94,2.18) | 1.39<br>(0.99,1.97) | <b>1.85</b><br>(1.18,2.92) | <b>1.60</b><br>(1.09,2.34) | <b>1.46</b><br>(1.09,1.96) | 1.21<br>(0.82,1.79)        | 1.28<br>(0.90,1.82)        | AcI                        | NA                         |
|                                                       | <b>0.61</b><br>(0.46,0.82) | 0.83<br>(0.57,1.20)        | 1.27<br>(0.89,1.83) | 1.21<br>(0.91,1.59) | 1.17<br>(0.99,1.38) | <b>1.56</b><br>(1.17,2.09) | <b>1.34</b><br>(1.10,1.64) | 1.23<br>(0.82,1.86)        | 1.02<br>(0.83,1.25)        | 1.08<br>(0.92,1.26)        | 0.84<br>(0.59,1.19)        | Tio18                      |

**Notes:** Comparisons between treatments should be read from left to right. The odds ratio (OR) with 95%CI are shown in the cells. OR more than 1 favors the column-defining treatment (lower triangle) and the row-defining treatment (upper triangle). Statistically significant results in **bold**.

**Abbreviations:** AcI, acclidinium; AcIForm, acclidinium/formoterol; FFVI, fluticasone/vilanterol; Glyco, glycopyrronium; IndaGlyco, indacaterol/glycopyrronium; Ipra, ipratropium; NA, results not available; SFC500, fluticasone/salmeterol 500/50mcg; Tio18, tiotropium 18mcg; TioOlo, tiotropium/olodaterol; Umecl, umeclidinium; UmeclVil, umeclidinium/vilanterol.

**Table S9** Treatment effects on proportion of SGRQ responders at week 24 - NMA results: combining direct and indirect evidence (lower triangle) and direct evidence (upper triangle)

|                                                       |                                   | Direct evidence     |                     |                                   |                     |                                   |                                   |                     |                                   |                                   |                                   |                                   |                                   |
|-------------------------------------------------------|-----------------------------------|---------------------|---------------------|-----------------------------------|---------------------|-----------------------------------|-----------------------------------|---------------------|-----------------------------------|-----------------------------------|-----------------------------------|-----------------------------------|-----------------------------------|
|                                                       |                                   | Placebo             | NA                  | <b>0.65</b><br><b>(0.46,0.90)</b> | NA                  | <b>0.59</b><br><b>(0.46,0.77)</b> | NA                                | 0.74<br>(0.54,1.02) | <b>0.45</b><br><b>(0.33,0.62)</b> | <b>0.63</b><br><b>(0.46,0.87)</b> | <b>0.74</b><br><b>(0.62,0.90)</b> | <b>0.52</b><br><b>(0.42,0.66)</b> | <b>0.70</b><br><b>(0.61,0.80)</b> |
| NMA results (combining direct and indirect estimates) | 0.84<br>(0.54,1.30)               | Ipra                | NA                  | NA                                | NA                  | NA                                | NA                                | NA                  | NA                                | NA                                | NA                                | NA                                | 0.855<br>(0.60,1.22)              |
|                                                       | <b>0.65</b><br><b>(0.44,0.95)</b> | 0.77<br>(0.43,1.39) | BudeForm            | NA                                | NA                  | NA                                | NA                                | NA                  | NA                                | NA                                | NA                                | NA                                | NA                                |
|                                                       | <b>0.55</b><br><b>(0.39,0.77)</b> | 0.65<br>(0.38,1.12) | 0.85<br>(0.51,1.42) | SFC500                            | NA                  | NA                                | 0.77<br>(0.53,1.12)               | 1.13<br>(0.88,1.47) | NA                                | NA                                | NA                                | NA                                | NA                                |
|                                                       | <b>0.60</b><br><b>(0.49,0.74)</b> | 0.72<br>(0.46,1.14) | 0.94<br>(0.60,1.45) | 1.11<br>(0.76,1.62)               | UmevVil             | NA                                | NA                                | NA                  | 1.20<br>(0.91,1.57)               | NA                                | NA                                | NA                                | 1.15<br>(0.88,1.50)               |
|                                                       | <b>0.49</b><br><b>(0.34,0.70)</b> | 0.59<br>(0.33,1.04) | 0.76<br>(0.45,1.29) | 0.90<br>(0.55,1.47)               | 0.81<br>(0.54,1.23) | TioOlo                            | NA                                | NA                  | NA                                | NA                                | NA                                | NA                                | <b>1.42</b><br><b>(1.19,1.70)</b> |
|                                                       | <b>0.55</b><br><b>(0.44,0.68)</b> | 0.65<br>(0.42,1.03) | 0.85<br>(0.54,1.32) | 1.00<br>(0.71,1.40)               | 0.90<br>(0.70,1.17) | 1.11<br>(0.73,1.68)               | IndaGlyco                         | NA                  | NA                                | <b>1.23</b><br><b>(1.05,1.45)</b> | NA                                | NA                                | <b>1.32</b><br><b>(1.12,1.55)</b> |
|                                                       | <b>0.53</b><br><b>(0.40,0.72)</b> | 0.64<br>(0.38,1.08) | 0.83<br>(0.51,1.35) | 0.98<br>(0.73,1.30)               | 0.88<br>(0.62,1.25) | 1.09<br>(0.68,1.73)               | 0.98<br>(0.70,1.35)               | AcIForm             | NA                                | NA                                | 1.17<br>(0.86,1.58)               | NA                                | NA                                |
|                                                       | <b>0.69</b><br><b>(0.50,0.95)</b> | 0.82<br>(0.48,1.39) | 1.06<br>(0.64,1.76) | 1.25<br>(0.79,1.99)               | 1.13<br>(0.83,1.55) | 1.40<br>(0.86,2.26)               | 1.26<br>(0.87,1.82)               | 1.29<br>(0.83,1.99) | Umev                              | NA                                | NA                                | NA                                | NA                                |
|                                                       | <b>0.71</b><br><b>(0.60,0.83)</b> | 0.84<br>(0.54,1.31) | 1.09<br>(0.72,1.67) | 1.29<br>(0.91,1.84)               | 1.17<br>(0.93,1.47) | 1.44<br>(0.97,2.13)               | <b>1.29</b><br><b>(1.06,1.57)</b> | 1.32<br>(0.96,1.83) | 1.03<br>(0.72,1.46)               | Glyco                             | NA                                | NA                                | 1.00<br>(0.83,1.21)               |
|                                                       | <b>0.55</b><br><b>(0.42,0.71)</b> | 0.66<br>(0.40,1.10) | 0.85<br>(0.53,1.36) | 1.01<br>(0.69,1.48)               | 0.91<br>(0.65,1.27) | 1.12<br>(0.72,1.75)               | 1.01<br>(0.73,1.39)               | 1.03<br>(0.75,1.42) | 0.80<br>(0.53,1.22)               | 0.78<br>(0.58,1.06)               | AcI                               | NA                                | NA                                |
|                                                       | <b>0.70</b><br><b>(0.55,0.89)</b> | 0.84<br>(0.51,1.38) | 1.08<br>(0.69,1.71) | 1.28<br>(0.84,1.94)               | 1.16<br>(0.84,1.58) | <b>1.42</b><br><b>(1.09,1.86)</b> | 1.28<br>(0.93,1.76)               | 1.31<br>(0.90,1.92) | 1.02<br>(0.68,1.53)               | 0.99<br>(0.74,1.33)               | 1.27<br>(0.89,1.81)               | Tio5                              | NA                                |
|                                                       | <b>0.71</b><br><b>(0.61,0.84)</b> | 0.85<br>(0.57,1.29) | 1.11<br>(0.73,1.69) | 1.31<br>(0.92,1.86)               | 1.18<br>(0.98,1.43) | 1.45<br>(0.98,2.15)               | <b>1.31</b><br><b>(1.07,1.59)</b> | 1.34<br>(0.97,1.85) | 1.04<br>(0.74,1.46)               | 1.01<br>(0.86,1.19)               | 1.30<br>(0.96,1.76)               | 1.02<br>(0.76,1.36)               | Tio18                             |

**Notes:** Comparisons between treatments should be read from left to right. The odds ratio (OR) with 95%CI are shown in the cells. OR more than 1 favors the column-defining treatment (lower triangle) and the row-defining treatment (upper triangle). Statistically significant results in **bold**.

**Abbreviations:** AcI, acclidinium; AcIForm, acclidinium/formoterol; BudeForm, budesonide/formoterol; Glyco, glycopyrronium; IndaGlyco, indacaterol/glycopyrronium; Ipra, ipratropium; NA, results not available; SFC500, fluticasone/salmeterol 500/50mcg; Tio5, tiotropium 5mcg; Tio18, tiotropium 18mcg; TioOlo, tiotropium/olodaterol; Umev, umeclidinium; UmevVil, umeclidinium/vilanterol.

**Table S10** Treatment effects on adverse events at week 12 -NMA results: combining direct and indirect evidence (lower triangle) and direct evidence (upper triangle)

|                                                       |                     | Direct evidence     |                     |                     |                     |                     |                     |                     |                     |                     |                     |                     |
|-------------------------------------------------------|---------------------|---------------------|---------------------|---------------------|---------------------|---------------------|---------------------|---------------------|---------------------|---------------------|---------------------|---------------------|
|                                                       |                     | Placebo             | 1.02<br>(0.75,1.39) | NA                  | 0.75<br>(0.26,2.15) | NA                  | 1.07<br>(0.76,1.51) | 1.21<br>(0.92,1.60) | 0.85<br>(0.42,1.70) | NA                  | 1.20<br>(0.73,1.99) | 1.20<br>(0.95,1.51) |
| NMA results (combining direct and indirect estimates) | 1.07<br>(0.83,1.38) | Ipra                | NA                  | 1.32<br>(0.87,2.00) | 0.85<br>(0.51,1.42) |
|                                                       | 0.99<br>(0.74,1.34) | 0.93<br>(0.64,1.35) | FFVI                | NA                  | 1.08<br>(0.73,1.59) | NA                  | NA                  | NA                  | NA                  | NA                  | NA                  | 1.15<br>(0.86,1.53) |
|                                                       | 1.04<br>(0.77,1.42) | 0.98<br>(0.66,1.45) | 1.05<br>(0.72,1.53) | SFC250              | NA                  | 1.05<br>(0.84,1.33) | NA                  | NA                  | NA                  | NA                  | NA                  | NA                  |
|                                                       | 1.09<br>(0.79,1.49) | 1.02<br>(0.69,1.51) | 1.10<br>(0.81,1.48) | 1.04<br>(0.73,1.49) | SFC500              | 1.09<br>(0.79,1.50) | NA                  | NA                  | NA                  | NA                  | NA                  | 0.48<br>(0.16,1.41) |
|                                                       | 1.12<br>(0.90,1.39) | 1.04<br>(0.75,1.45) | 1.13<br>(0.83,1.53) | 1.07<br>(0.85,1.34) | 1.03<br>(0.78,1.35) | UmeclVil            | NA                  | NA                  | NA                  | NA                  | NA                  | 0.96<br>(0.66,1.41) |
|                                                       | 1.25<br>(0.96,1.63) | 1.17<br>(0.82,1.66) | 1.26<br>(0.85,1.87) | 1.20<br>(0.80,1.80) | 1.15<br>(0.76,1.73) | 1.12<br>(0.79,1.58) | TioOlo              | NA                  | NA                  | NA                  | 0.96<br>(0.72,1.26) | NA                  |
|                                                       | 1.01<br>(0.77,1.33) | 0.95<br>(0.67,1.35) | 1.02<br>(0.74,1.42) | 0.97<br>(0.67,1.42) | 0.93<br>(0.65,1.34) | 0.91<br>(0.67,1.24) | 0.81<br>(0.56,1.18) | Umec                | 1.05<br>(0.82,1.35) | NA                  | NA                  | 1.11<br>(0.85,1.45) |
|                                                       | 1.09<br>(0.82,1.46) | 1.02<br>(0.71,1.48) | 1.10<br>(0.78,1.55) | 1.05<br>(0.71,1.55) | 1.00<br>(0.69,1.47) | 0.98<br>(0.71,1.35) | 0.87<br>(0.59,1.29) | 1.08<br>(0.87,1.33) | Glyco               | NA                  | NA                  | 0.99<br>(0.73,1.35) |
|                                                       | 1.17<br>(0.85,1.61) | 1.10<br>(0.73,1.65) | 1.18<br>(0.77,1.83) | 1.12<br>(0.72,1.75) | 1.08<br>(0.69,1.68) | 1.05<br>(0.71,1.54) | 0.94<br>(0.62,1.42) | 1.16<br>(0.76,1.75) | 1.07<br>(0.70,1.65) | Acl                 | NA                  | NA                  |
|                                                       | 1.23<br>(0.98,1.53) | 1.15<br>(0.85,1.56) | 1.24<br>(0.85,1.79) | 1.18<br>(0.80,1.72) | 1.13<br>(0.77,1.66) | 1.10<br>(0.80,1.50) | 0.98<br>(0.75,1.28) | 1.21<br>(0.86,1.71) | 1.12<br>(0.78,1.62) | 1.05<br>(0.71,1.54) | Tio5                | NA                  |
|                                                       | 1.12<br>(0.94,1.35) | 1.05<br>(0.79,1.41) | 1.13<br>(0.88,1.46) | 1.08<br>(0.78,1.48) | 1.03<br>(0.77,1.40) | 1.01<br>(0.80,1.27) | 0.90<br>(0.65,1.24) | 1.11<br>(0.90,1.37) | 1.03<br>(0.82,1.30) | 0.96<br>(0.67,1.38) | 0.92<br>(0.69,1.22) | Tio18               |

**Notes:** Comparisons between treatments should be read from left to right. The odds ratio (OR) with 95%CI are shown in the cells. OR more than 1 favors the row-defining treatment

(lower triangle) and the column-defining treatment (upper triangle). Statistically significant results in **bold**.

**Abbreviations:** Acl, acclidinium; FFVI, fluticasone/vilanterol; Glyco, glycopyrronium; Ipra, ipratropium; NA, results not available; SFC250, fluticasone/salmeterol 250/50mcg; SFC500,

fluticasone/salmeterol 500/50mcg; Tio5, tiotropium 5mcg; Tio18, tiotropium 18mcg; TioOlo, tiotropium/olodaterol; Umec, umeclidinium; UmecVil, umeclidinium/vilanterol.

**Table S11** Treatment effects on adverse events at week 24 - NMA results: combining direct and indirect evidence (lower triangle) and direct evidence (upper triangle)

| NMA results (combining direct and indirect estimates) | Direct evidence     |                     |                     |                     |                                   |                     |                                   |                                   |                     |                     |                     |
|-------------------------------------------------------|---------------------|---------------------|---------------------|---------------------|-----------------------------------|---------------------|-----------------------------------|-----------------------------------|---------------------|---------------------|---------------------|
|                                                       | Placebo             | 0.93<br>(0.69,1.23) | 0.76<br>(0.55,1.06) | 0.77<br>(0.49,1.19) | 0.80<br>(0.53,1.21)               | NA                  | 1.12<br>(0.81,1.53)               | NA                                | 0.81<br>(0.60,1.10) | 1.11<br>(0.84,1.48) | 0.92<br>(0.75,1.14) |
|                                                       | 0.93<br>(0.67,1.29) | FFVI                | NA                  | NA                  | NA                                | NA                  | NA                                | NA                                | NA                  | NA                  |                     |
|                                                       | 0.76<br>(0.50,1.16) | 0.82<br>(0.48,1.40) | BudeForm            | NA                  | NA                                | NA                  | NA                                | NA                                | NA                  | NA                  |                     |
|                                                       | 0.77<br>(0.46,1.28) | 0.83<br>(0.45,1.52) | 1.01<br>(0.52,1.95) | SFC250              | NA                                | NA                  | NA                                | NA                                | NA                  | NA                  |                     |
|                                                       | 0.86<br>(0.65,1.13) | 0.92<br>(0.60,1.42) | 1.12<br>(0.68,1.86) | 1.11<br>(0.62,1.99) | SFC500                            | NA                  | <b>1.29</b><br><b>(1.04,1.62)</b> | <b>1.30</b><br><b>(1.01,1.69)</b> | NA                  | NA                  |                     |
|                                                       | 0.85<br>(0.59,1.21) | 0.91<br>(0.56,1.49) | 1.11<br>(0.64,1.92) | 1.10<br>(0.59,2.05) | 0.99<br>(0.65,1.51)               | UmecVil             | NA                                | NA                                | NA                  | NA                  | 1.19<br>(0.92,1.53) |
|                                                       | 1.15<br>(0.87,1.51) | 1.24<br>(0.81,1.90) | 1.50<br>(0.91,2.48) | 1.49<br>(0.84,2.66) | <b>1.34</b><br><b>(1.04,1.72)</b> | 1.35<br>(0.91,2.01) | IndaGlyco                         | NA                                | NA                  | 0.77<br>(0.60,1.00) | 0.91<br>(0.71,1.18) |
|                                                       | 1.11<br>(0.70,1.76) | 1.20<br>(0.68,2.12) | 1.46<br>(0.78,2.72) | 1.45<br>(0.73,2.88) | 1.30<br>(0.90,1.88)               | 1.32<br>(0.75,2.30) | 0.97<br>(0.62,1.51)               | AcIForm                           | NA                  | NA                  | NA                  |
|                                                       | 0.81<br>(0.54,1.21) | 0.88<br>(0.52,1.47) | 1.06<br>(0.60,1.90) | 1.06<br>(0.55,2.02) | 0.95<br>(0.58,1.54)               | 0.96<br>(0.56,1.64) | 0.71<br>(0.44,1.15)               | 0.73<br>(0.40,1.34)               | Umec                | NA                  | NA                  |
|                                                       | 1.06<br>(0.84,1.33) | 1.14<br>(0.76,1.70) | 1.38<br>(0.86,2.23) | 1.38<br>(0.79,2.41) | 1.23<br>(0.89,1.72)               | 1.25<br>(0.85,1.83) | 0.92<br>(0.68,1.25)               | 0.95<br>(0.58,1.55)               | 1.30<br>(0.82,2.06) | Glyco               | 1.18<br>(0.91,1.53) |
| 1.00<br>(0.78,1.30)                                   | 1.08<br>(0.71,1.65) | 1.32<br>(0.81,2.15) | 1.31<br>(0.74,2.32) | 1.17<br>(0.83,1.65) | 1.19<br>(0.93,1.52)               | 0.88<br>(0.64,1.20) | 0.90<br>(0.55,1.49)               | 1.24<br>(0.77,1.99)               | 0.95<br>(0.71,1.28) | Tio18               |                     |

**Notes:** Comparisons between treatments should be read from left to right. The odds ratio (OR) with 95%CI are shown in the cells. OR more than 1 favors the row-defining treatment

(lower triangle) and the column-defining treatment (upper triangle). Statistically significant results in **bold**.

**Abbreviations:** AcIForm, acclidinium/formoterol; BudeForm, budesonide/formoterol; FFVI, fluticasone/vilanterol; Glyco, glycopyrronium; IndaGlyco, indacaterol/glycopyrronium; NA, results not available; SFC250, fluticasone/salmeterol 250/50mcg; SFC500, fluticasone/salmeterol 500/50mcg; Tio18, tiotropium 18mcg; Umec, umeclidinium; UmecVil, umeclidinium/vilanterol.
